# Supplementary material
Source: Elsevier journal article supplement (https://www.sciencedirect.com/science/article/pii/S0365669119303636)
Supplement: mmc1 [file S0365669119303636:mmc1.docx]

**Materiales complementarios**

**Tabla 1 complementaria.** Resumen de los estudios no incluidos en el análisis

| **Comentario** | **Autor** | **Tipo** | **Caso** | | | **Control** | | |
| --- | --- | --- | --- | --- | --- | --- | --- | --- |
| **n** | **Media** | **DS** | **n** | **Media** | **DS** |
| No adecuado para análisis de datos | Chono et al, 2018 [1] | GPAA | 38 | na# | na | 100 | na | na |
| GEX | 31 | na | na |
| No adecuado para análisis de datos | Chua et al, 2012* [2] | GPCA | 12 | 24,75# | 19,5 | 23 | 6,79 | 4,75 |
| No fue caso y control | Cvenkel et al, 2010* [3] | GPAA | 26 | 69,5 | 39,5 | na | na | na |
| GEX | 4 | 36,5 | 6,25 |
| No adecuado para análisis de datos | Du et al, 2016* [4] | GPCA | 18 | 346,755# | 254,93 | 18 | 5,1625 | 3,1375 |
| No adecuado para análisis de datos | Duvesh et al, 2017* [5] | GPCA | 19 | 52,69# | 39,23 | 14 | 11,905 | 3,925 |
| No adecuado para análisis de datos | Gramlich et al, 2013 [6] | Glaucoma | 5 | 13394# | 2749 | 5 | 9990 | 1632 |
| No adecuado para análisis de datos | Inoue et al, 2012 [7] | GPAA | 23 | 15,2# | na | 52 | 4,6 | na |
| GEX | 26 | 12,3 | na |
| No adecuado para análisis de datos | Wang et al, 2018 [8] | GPCA | 40 | 5,8 | 7,5 | 24 | 6,7 | 7,7 |

GPAA, glaucoma primario de ángulo abierto; GPCA, glaucoma primario de cierre angular; GEX, glaucoma exfoliativo; n and DS, representa el número de muestras y desviación estándar de pacientes de glaucoma y sujetos de control, respectivamente. *Indica que la media y DS se estimaron de mediana, rango y tamaño de la muestra según lo descrito anteriormente [9]. #Indica una diferencia significativa comparada con el control.

**Bibliografía**

1. Chono I,Miyazaki D,Miyake H, Komatsu N, Ehara F, Nagase D,et al. High interleukin-8 level in aqueous humor is associated with poor prognosis in eyes with open angle glaucoma and neovascular glaucoma. Sci Rep 2018; 8:14533. doi: 10.1038/s41598-018-32725-3.
2. Chua J, Vania M, Cheung CM, Ang M, Chee SP, Yang H, et al. Expression profile of inflammatory cytokines in aqueous from glaucomatous eyes. Mol Vis 2012; 18:431-8.
3. Cvenkel B, Kopitar AN, Ihan A. Inflammatory molecules in aqueous humour and on ocular surface and glaucoma surgery outcome. Mediators Inflamm 2010; 2010:939602. doi: 10.1155/2010/939602.
4. Du S, Huang W, Zhang X, Wang J, Wang W, Lam DSC. Multiplex cytokine levels of aqueous humor in acute primary angle-closure patients: fellow eye comparison. BMC Ophthalmol 2016; 16:6. doi: 10.1186/s12886-016-0182-8.
5. Duvesh R, Puthuran G, Srinivasan K, Rengaraj V, Krishnadas SR, Rajendrababu S, et al. Multiplex Cytokine Analysis of Aqueous Humor from the Patients with Chronic Primary Angle Closure Glaucoma. Curr Eye Res 2017; 42:1608-1613. doi: 10.1080/02713683.2017.1362003.
6. Gramlich OW, Beck , von Thun Und Hohenstein-Blaul N, Boehm N, Ziegler A, Vetter JM, et al. Enhanced insight into the autoimmune component of glaucoma: IgG autoantibody accumulation and pro-inflammatory conditions in human glaucomatous retina. PLoS One 2013; 8:e57557. doi: 10.1371/journal.pone.0057557.
7. Inoue T, Kawaji T, Inatani M, Kameda T, Yoshimura N, Tanihara H. Simultaneous increases in multiple proinflammatory cytokines in the aqueous humor in pseudophakic glaucomatous eyes. J Cataract Refract Surg 2012; 38(8):1389-97. doi: 10.1016/j.jcrs.2012.04.028.
8. Wang Y, Chen S, Liu Y, Huang W, Li X, Zhang X. Inflammatory cytokine profiles in eyes with primary angle-closure glaucoma. Biosci Rep 2018; 38. pii: BSR20181411. doi: 10.1042/BSR20181411.
9. Hozo SP, Djulbegovic B, Hozo I. Estimating the mean and variance from the median, range, and the size of a sample. BMC Med Res Methodol 2005;5:13. doi: 10.1186/1471-2288-5-13.
